# Supplementary material for: Associations between social determinants of health and interpersonal violence-related injury in Cameroon: a cross-sectional study
Source: HighWire-hosted journal article supplement (doi:10.1136/bmjgh-2021-007220), 2022-01-01
Supplement: bmjgh-2021-007220supp001_data_supplement.pdf [file bmjgh-2021-007220supp001_data_supplement.pdf]

NATIONAL TRAUMA REGISTRY

Hospital  HLD  HRL  HRB  HCP  HRE Patient Name \_\_\_\_\_ Patient Record Number \_\_\_\_\_

Date of Arrival  /  /  Time (24h)  :  Was emergency assistance offered?  No  Yes\*  Unk.

No  Yes  Unknown \*If YES, was this used?  No  Yes  Refused by family  Unk.

Transfer  No  Yes  Unknown Facility \_\_\_\_\_

Reason for Transfer  Increased level of care  Patient preference  Other (specify): \_\_\_\_\_  
 Inability to pay  Unknown

| DEMOGRAPHICS                                                                                                                   |  |                                                                                                                                                                     |  |                                                                                 |                  |                                                                                 |  |                                             |  |
|--------------------------------------------------------------------------------------------------------------------------------|--|---------------------------------------------------------------------------------------------------------------------------------------------------------------------|--|---------------------------------------------------------------------------------|------------------|---------------------------------------------------------------------------------|--|---------------------------------------------|--|
| Age (years) _____                                                                                                              |  | Sex <input type="checkbox"/> Male <input type="checkbox"/> Female                                                                                                   |  | Distance Travelled (km) _____                                                   |                  | Injury Date: <input type="text"/> / <input type="text"/> / <input type="text"/> |  |                                             |  |
| Address _____                                                                                                                  |  | Phone Number _____                                                                                                                                                  |  | Education                                                                       |                  | Type of cooking fuel used in household (select all)                             |  | Other (specify): _____                      |  |
| Is the Household <input type="checkbox"/> Rural <input type="checkbox"/> Urban <input type="checkbox"/> 99 Unk                 |  | Does your household own, rent, or live for free in their residence?                                                                                                 |  | 0 No cost                                                                       |                  | 1 Rent                                                                          |  | 2 Own <input type="checkbox"/> 99 Unk       |  |
| Does the Household... Own a cellphone <input type="checkbox"/> Yes <input type="checkbox"/> No <input type="checkbox"/> 99 Unk |  | Own agricultural land? <input type="checkbox"/> Yes <input type="checkbox"/> No <input type="checkbox"/> 99 Unk                                                     |  | Occupation                                                                      |                  | Housewife/husband                                                               |  | Retired                                     |  |
|                                                                                                                                |  |                                                                                                                                                                     |  | Self-Employed                                                                   |                  | Unemployed (able to work)                                                       |  | Unknown                                     |  |
|                                                                                                                                |  |                                                                                                                                                                     |  | Salaried Worker                                                                 |                  | Unemployed (unable to work)                                                     |  | Other:                                      |  |
|                                                                                                                                |  |                                                                                                                                                                     |  | Student                                                                         |                  |                                                                                 |  |                                             |  |
| ARRIVAL                                                                                                                        |  |                                                                                                                                                                     |  |                                                                                 | PREHOSPITAL CARE |                                                                                 |  |                                             |  |
| Signs of Life <input type="checkbox"/> No <input type="checkbox"/> Yes                                                         |  | CPR <input type="checkbox"/> No <input type="checkbox"/> Yes                                                                                                        |  | Respirations Assisted <input type="checkbox"/> No <input type="checkbox"/> Yes* |                  | Vital Signs Taken? <input type="checkbox"/> No** <input type="checkbox"/> Yes   |  | *Assisted RR                                |  |
|                                                                                                                                |  |                                                                                                                                                                     |  |                                                                                 |                  |                                                                                 |  |                                             |  |
| BP / HR RR T Celsius                                                                                                           |  |                                                                                                                                                                     |  |                                                                                 |                  |                                                                                 |  |                                             |  |
| 1 Time (hh:mm) :                                                                                                               |  |                                                                                                                                                                     |  |                                                                                 |                  |                                                                                 |  |                                             |  |
| 2 Time (hh:mm) :                                                                                                               |  |                                                                                                                                                                     |  |                                                                                 |                  |                                                                                 |  |                                             |  |
| 3 Time (hh:mm) :                                                                                                               |  |                                                                                                                                                                     |  |                                                                                 |                  |                                                                                 |  |                                             |  |
| On the day of the injury, did the injured person... (Select all that apply)                                                    |  | <input type="checkbox"/> Stop Breathing?                                                                                                                            |  | <input type="checkbox"/> Lose Consciousness?                                    |                  | <input type="checkbox"/> Act Confused?                                          |  | <input type="checkbox"/> Forget the Injury? |  |
|                                                                                                                                |  | <input type="checkbox"/> Need to be carried to leave the injury?                                                                                                    |  | <input type="checkbox"/> None*                                                  |                  | <input type="checkbox"/> Unknown**                                              |  |                                             |  |
| Was patient consent obtained? If yes, sign below.                                                                              |  | From whom did you obtain consent? <input type="checkbox"/> Patient <input type="checkbox"/> Guardian <input type="checkbox"/> Minor <input type="checkbox"/> Parent |  | Completed by: _____                                                             |                  | Signature: _____                                                                |  |                                             |  |

NATIONAL TRAUMA REGISTRY

| PRIMARY SURVEY                    |                                      |                                        | Intervention (check all that apply)                     |                                    |                                                                      | Injury Context                   |                                      |                                           |                      |             |
|-----------------------------------|--------------------------------------|----------------------------------------|---------------------------------------------------------|------------------------------------|----------------------------------------------------------------------|----------------------------------|--------------------------------------|-------------------------------------------|----------------------|-------------|
| <b>A</b>                          | Airway Patent?                       |                                        | 1 Yes                                                   | 0 No                               | Repositioning                                                        | <b>Injury Place</b>              | 1 Private House/Home                 | 9 Sea/Lake/River/Well/Other body of water |                      |             |
|                                   |                                      |                                        |                                                         |                                    | Suctioning                                                           |                                  | 2 Residential Institution            | 10 Sports/Athletic Area                   |                      |             |
|                                   |                                      |                                        |                                                         |                                    | Non-invasive Airway                                                  |                                  | 3 Medical Service Area               | 11 School/Institution/Educational Area    |                      |             |
|                                   |                                      |                                        |                                                         |                                    | Endotracheal Intubation<br>Time (24hr):                              |                                  | 4 Street/Highway/Road                | 12 Public/Administrative Area             |                      |             |
|                                   |                                      |                                        |                                                         |                                    | 5 Railway Line/Station                                               | 13 Open Land/Beach/Forest/Desert |                                      |                                           |                      |             |
|                                   |                                      |                                        |                                                         |                                    | 6 Trade/Service Area                                                 | 99 Unknown                       |                                      |                                           |                      |             |
|                                   |                                      |                                        |                                                         |                                    | 7 Industrial Construction Area                                       | 98 Other                         |                                      |                                           |                      |             |
|                                   |                                      |                                        |                                                         |                                    | 8 Farm/Place of Primary Production                                   | <b>Specify:</b>                  |                                      |                                           |                      |             |
| <b>B</b>                          | Spontaneous Respiration?             |                                        | 1 Yes, Normal                                           | 0 No                               | Oxygen Supplementation                                               | <b>Injury Activity</b>           | 1 Work                               | 5 Traveling not elsewhere defined         |                      |             |
|                                   |                                      |                                        |                                                         |                                    | BVM                                                                  |                                  | 2 Education                          | 99 Unknown                                |                      |             |
|                                   | Chest Movement?                      |                                        | 1 Yes, Normal                                           | 0 No                               | Intubation Time (24hr):                                              |                                  | 3 Sports                             | 98 Other                                  |                      |             |
|                                   |                                      |                                        |                                                         |                                    |                                                                      |                                  | 4 Leisure/Play                       | <b>Specify:</b>                           |                      |             |
|                                   | Tracheal Deviation?                  |                                        | 0 Midline                                               |                                    | Needle placed Time (24hr):                                           | <b>Risk Factors</b>              |                                      |                                           |                      |             |
|                                   |                                      | 1 Deviated                             |                                                         |                                    | Did alcohol likely contribute to the injury?                         |                                  |                                      |                                           |                      |             |
| Breath Sounds?                    |                                      | 0 Equal/Bilateral                      |                                                         | Chest Tube Time (24hr):            | 1 Yes 0 No 99 Unknown                                                |                                  |                                      |                                           |                      |             |
|                                   |                                      | 1 Unequal/Abnormal                     |                                                         |                                    | Did overcrowding likely contribute to the injury?                    |                                  |                                      |                                           |                      |             |
|                                   |                                      |                                        |                                                         |                                    | 1 Yes 0 No 99 Unknown                                                |                                  |                                      |                                           |                      |             |
| <b>C</b>                          | Palpable Pulse?                      |                                        | 1 Yes                                                   | 0 No                               | IV Placed                                                            | <b>Mechanism Type</b>            | 1 Blunt                              | 3 Mixed                                   |                      |             |
|                                   | Signs of External Bleeding?          |                                        | 1 Yes                                                   | 0 No                               | Intraosseous Line Placed                                             |                                  | 2 Penetrating                        | 4 Neither/Other                           |                      |             |
|                                   |                                      |                                        |                                                         |                                    | Central Venous Line Placed                                           | <b>Mechanism</b>                 | 1 Road traffic injury                | 9 Poisoning                               |                      |             |
|                                   | FAST                                 |                                        | 0 Negative                                              |                                    | Blood Initiated Time (24hr):                                         |                                  | 2 Struck/hit by person/animal/object | 10 Suffocation/Choking/Hanging            |                      |             |
|                                   |                                      |                                        | 1 Positive                                              |                                    |                                                                      |                                  | 3 Fall                               | 11 Electrocution                          |                      |             |
|                                   |                                      |                                        | 2 Indeterminate                                         |                                    | Tourniquet Placed Time (24 hr) placed:                               |                                  | 4 Stab/cut                           | 12 Firearm/Gunshot                        |                      |             |
|                                   |                                      | 3 Not done                             |                                                         |                                    | 5 Animal bite                                                        |                                  | 13 Explosive Blast                   |                                           |                      |             |
|                                   |                                      |                                        |                                                         | Time (24 hr) removed:              | 6 Drowning/Submersion                                                |                                  | 14 Envenomation                      |                                           |                      |             |
| Diagnostic Peritoneal Lavage      |                                      | 0 Negative                             |                                                         |                                    | 7 Burn (smoke/fire/flames)                                           | 99 Unknown <b>Specify:</b>       |                                      |                                           |                      |             |
|                                   |                                      | 1 Positive                             |                                                         |                                    | 8 Scald                                                              | 98 Other                         |                                      |                                           |                      |             |
|                                   |                                      | 2 Indeterminate                        |                                                         |                                    | <b>IF RTI, specify</b>                                               | <b>RTI</b>                       | <b>Counterpart (select all)</b>      |                                           |                      |             |
|                                   |                                      | 3 Not done                             |                                                         |                                    |                                                                      |                                  |                                      | 1 Pedestrian                              | 7 Minivan or Minibus | Pedestrian  |
| Pupils                            |                                      | 1 Normal                               |                                                         |                                    |                                                                      |                                  |                                      | 2 Private Car                             | 8 Bus                | Private Car |
|                                   |                                      | 2 Abnormal                             |                                                         |                                    |                                                                      |                                  |                                      | 3 Taxi                                    | 9 Train              | Taxi        |
| C-Collar in Place?                |                                      | 0 No, not indicated                    | 2 Placed in ER                                          |                                    |                                                                      |                                  |                                      | 4 Motorcycle                              | 99 Unknown           | Motorcycle  |
|                                   |                                      | 1 Yes                                  | 3 Indicated, not done                                   |                                    |                                                                      |                                  |                                      | 5 Mototaxi                                | 98 Other             | Mototaxi    |
|                                   |                                      |                                        |                                                         |                                    | 6 Truck                                                              | <b>Specify:</b>                  | Truck                                |                                           |                      |             |
|                                   |                                      |                                        |                                                         |                                    | <b>Seatbelt used?</b> 0 No, not used 1 Yes 97 Not applicable 99 Unk. |                                  |                                      |                                           |                      |             |
|                                   |                                      |                                        |                                                         |                                    | <b>Carseat used?</b> 0 No, not used 1 Yes 97 Not applicable 99 Unk.  |                                  |                                      |                                           |                      |             |
|                                   |                                      |                                        |                                                         |                                    | <b>Helmet used?</b> 0 No, not used 1 Yes 97 Not applicable 99 Unk.   |                                  |                                      |                                           |                      |             |
|                                   |                                      |                                        |                                                         |                                    | <b>Airbag deployed?</b> 0 No, not used 1 Yes 97 No airbags 99 Unk.   |                                  |                                      |                                           |                      |             |
| <b>D</b>                          | Glasgow Coma Score                   |                                        |                                                         |                                    | <b>Intent</b>                                                        | 0 Unintentional                  | 3 Legal intervention/War operations  |                                           |                      |             |
|                                   | Eyes                                 |                                        | Verbal                                                  |                                    |                                                                      | 1 Intentional (self-harm)        | 4 Events unclear                     |                                           |                      |             |
|                                   | 4 Spontaneous eye opening            |                                        | 5 Oriented                                              |                                    |                                                                      | 2 Intentional (assault/homicide) | 99 Unknown                           |                                           |                      |             |
|                                   | 3 Eye opening to verbal stimulus     |                                        | 4 Confused, disoriented                                 |                                    |                                                                      | <b>Perpetrator</b>               |                                      |                                           |                      |             |
| 2 Eye opening to painful stimulus |                                      | 3 Inappropriate words                  |                                                         | 1 Partner/Ex-partner               | 5 Stranger                                                           |                                  |                                      |                                           |                      |             |
| 1 No eye opening                  |                                      | 2 Incomprehensible sounds              |                                                         | 2 Parent                           | 99 Unknown                                                           |                                  |                                      |                                           |                      |             |
|                                   |                                      | 1 No verbal response                   |                                                         | 3 Other Relative                   | 98 Other                                                             |                                  |                                      |                                           |                      |             |
|                                   |                                      |                                        |                                                         | 4 Friend/Acquaintance              | <b>Specify:</b>                                                      |                                  |                                      |                                           |                      |             |
| GCS Qualifier                     |                                      |                                        |                                                         | <b>Context</b>                     |                                                                      |                                  |                                      |                                           |                      |             |
| 0 None--Valid GCS                 |                                      | 2 Patient intubated                    |                                                         | Assault                            |                                                                      |                                  |                                      |                                           |                      |             |
| 1 Obstruction to patient's eye    |                                      | 3 Patient chemically sedated/paralysed |                                                         | Robbery/Home invasion              |                                                                      |                                  |                                      |                                           |                      |             |
|                                   |                                      |                                        |                                                         | Sexual assault/ Rape/Attempted Rap |                                                                      |                                  |                                      |                                           |                      |             |
|                                   |                                      |                                        |                                                         | Taxi-related assault               |                                                                      |                                  |                                      |                                           |                      |             |
|                                   |                                      |                                        |                                                         | 99 Unknown                         |                                                                      |                                  |                                      |                                           |                      |             |
|                                   |                                      |                                        |                                                         | 98 Other                           |                                                                      |                                  |                                      |                                           |                      |             |
|                                   |                                      |                                        |                                                         | <b>Specify:</b>                    |                                                                      |                                  |                                      |                                           |                      |             |
| <b>E</b>                          | Patient disobeyed for complete exam? |                                        | Temperature control measures initiated, if appropriate? |                                    |                                                                      |                                  |                                      |                                           |                      |             |
|                                   | 1 Yes                                |                                        | 1 Yes                                                   |                                    |                                                                      |                                  |                                      |                                           |                      |             |
| 0 No                              |                                      | 0 No                                   |                                                         |                                    |                                                                      |                                  |                                      |                                           |                      |             |
|                                   |                                      | 97 Not applicable                      |                                                         |                                    |                                                                      |                                  |                                      |                                           |                      |             |

# NATIONAL TRAUMA REGISTRY

| SECONDARY SURVEY                                                                                                                                                                                               |                                                      |                                                           |                                |                 |                                          |                                  |                                                  |     |             |      |          |                                                               |                                                                                                            |                                                       |                                                  |                     |                    |                  |
|----------------------------------------------------------------------------------------------------------------------------------------------------------------------------------------------------------------|------------------------------------------------------|-----------------------------------------------------------|--------------------------------|-----------------|------------------------------------------|----------------------------------|--------------------------------------------------|-----|-------------|------|----------|---------------------------------------------------------------|------------------------------------------------------------------------------------------------------------|-------------------------------------------------------|--------------------------------------------------|---------------------|--------------------|------------------|
| Diagnostics*                                                                                                                                                                                                   |                                                      |                                                           |                                |                 |                                          |                                  |                                                  |     |             |      |          |                                                               |                                                                                                            |                                                       |                                                  |                     |                    |                  |
| Radiology Matrix                                                                                                                                                                                               | Head                                                 | Neck                                                      | Chest                          | Abd.            | Pelvis                                   | Spine                            | Extremities                                      |     |             |      | Vascular | For each study please note time ordered and performed (HH:MM) | If 1+ study was recommended but not performed, which of the following contributed? (select all that apply) |                                                       |                                                  |                     |                    |                  |
|                                                                                                                                                                                                                | X-ray                                                |                                                           |                                |                 |                                          |                                  | LUE                                              | RUE | LLE         | RLE  |          |                                                               |                                                                                                            | <input type="checkbox"/> Inability to pay             | <input type="checkbox"/> No staff                |                     |                    |                  |
|                                                                                                                                                                                                                | Ultrasound                                           |                                                           |                                |                 |                                          |                                  |                                                  |     |             |      |          |                                                               |                                                                                                            | <input type="checkbox"/> Patient preference           | <input type="checkbox"/> No functional equipment |                     |                    |                  |
|                                                                                                                                                                                                                | CT Scan                                              |                                                           |                                |                 |                                          |                                  |                                                  |     |             |      |          |                                                               |                                                                                                            | <input type="checkbox"/> Long wait time               | <input type="checkbox"/> Other**                 |                     |                    |                  |
|                                                                                                                                                                                                                | MRI                                                  |                                                           |                                |                 |                                          |                                  |                                                  |     |             |      |          |                                                               |                                                                                                            | <input type="checkbox"/> Patient left AMA             | **Specify:                                       |                     |                    |                  |
| *For each study fill in the best description: 0=Recommended, not performed 1=Performed, normal result 2=Performed, indeterminate result 3=Performed, abnormal result 99=Unknown                                |                                                      |                                                           |                                |                 |                                          |                                  |                                                  |     |             |      |          |                                                               |                                                                                                            |                                                       |                                                  |                     |                    |                  |
| Injuries                                                                                                                                                                                                       |                                                      |                                                           |                                |                 |                                          |                                  |                                                  |     |             |      |          |                                                               |                                                                                                            |                                                       |                                                  |                     |                    |                  |
| Injury Matrix                                                                                                                                                                                                  | H&N                                                  | Face                                                      | Chest                          | Abd.            | Pelvis                                   | Spine                            |                                                  |     | Extremities |      |          | Highest Estimated AIS Score                                   | Known Past Medical History                                                                                 |                                                       | Labs                                             |                     |                    |                  |
|                                                                                                                                                                                                                |                                                      |                                                           |                                |                 |                                          | C                                | T                                                | L   | LU          | RU   | LL       |                                                               | RL                                                                                                         | 0                                                     | No active medical problems                       | <b>Test</b>         | <b>Recommended</b> | <b>Performed</b> |
| Bruise/abrasion                                                                                                                                                                                                |                                                      |                                                           |                                |                 |                                          |                                  |                                                  |     |             |      |          |                                                               | 1                                                                                                          | Unknown: Patient cannot respond and no family present | <b>UPT</b>                                       | 0 No                | 0 No               | 0 Negative       |
| Sprain/strain                                                                                                                                                                                                  |                                                      |                                                           |                                |                 |                                          |                                  |                                                  |     |             |      |          |                                                               | 2                                                                                                          | Active acute illness                                  | 1 Yes                                            | 1 Yes               | 1 Positive         |                  |
| Bullet entry/exit                                                                                                                                                                                              |                                                      |                                                           |                                |                 |                                          |                                  |                                                  |     |             |      |          |                                                               | 3                                                                                                          | Chronic illness or chronic and acute illness          | 2 Yes, not back yet                              | 2 Yes, not back yet |                    |                  |
| Penetrating wound                                                                                                                                                                                              |                                                      |                                                           |                                |                 |                                          |                                  |                                                  |     |             |      |          |                                                               |                                                                                                            |                                                       |                                                  |                     |                    |                  |
| Other laceration (superficial)                                                                                                                                                                                 |                                                      |                                                           |                                |                 |                                          |                                  |                                                  |     |             |      |          |                                                               |                                                                                                            |                                                       |                                                  |                     |                    |                  |
| Other laceration (deep)                                                                                                                                                                                        |                                                      |                                                           |                                |                 |                                          |                                  |                                                  |     |             |      |          |                                                               |                                                                                                            |                                                       |                                                  |                     |                    |                  |
| Avulsion/amputation                                                                                                                                                                                            |                                                      |                                                           |                                |                 |                                          |                                  |                                                  |     |             |      |          |                                                               |                                                                                                            |                                                       |                                                  |                     |                    |                  |
| Closed fracture                                                                                                                                                                                                |                                                      |                                                           |                                |                 |                                          |                                  |                                                  |     |             |      |          |                                                               |                                                                                                            |                                                       |                                                  |                     |                    |                  |
| Open fracture                                                                                                                                                                                                  |                                                      |                                                           |                                |                 |                                          |                                  |                                                  |     |             |      |          |                                                               |                                                                                                            |                                                       |                                                  |                     |                    |                  |
| Dislocation                                                                                                                                                                                                    |                                                      |                                                           |                                |                 |                                          |                                  |                                                  |     |             |      |          |                                                               |                                                                                                            |                                                       |                                                  |                     |                    |                  |
| Burn                                                                                                                                                                                                           |                                                      |                                                           |                                |                 |                                          |                                  |                                                  |     |             |      |          |                                                               |                                                                                                            |                                                       |                                                  |                     |                    |                  |
| Viscera Exposed                                                                                                                                                                                                |                                                      |                                                           |                                |                 |                                          |                                  |                                                  |     |             |      |          |                                                               |                                                                                                            |                                                       |                                                  |                     |                    |                  |
| Hematoma                                                                                                                                                                                                       |                                                      |                                                           |                                |                 |                                          |                                  |                                                  |     |             |      |          |                                                               |                                                                                                            |                                                       |                                                  |                     |                    |                  |
| Neurologic deficit                                                                                                                                                                                             |                                                      |                                                           |                                |                 |                                          |                                  |                                                  |     |             |      |          |                                                               |                                                                                                            |                                                       |                                                  |                     |                    |                  |
| Diminished Pulse                                                                                                                                                                                               |                                                      |                                                           |                                |                 |                                          |                                  |                                                  |     |             |      |          |                                                               |                                                                                                            |                                                       |                                                  |                     |                    |                  |
| Degloving                                                                                                                                                                                                      |                                                      |                                                           |                                |                 |                                          |                                  |                                                  |     |             |      |          |                                                               |                                                                                                            |                                                       |                                                  |                     |                    |                  |
| Clinician Diagnosis: 1                                                                                                                                                                                         |                                                      |                                                           |                                |                 |                                          |                                  |                                                  |     |             |      |          |                                                               |                                                                                                            |                                                       |                                                  |                     |                    |                  |
| Treatment                                                                                                                                                                                                      |                                                      |                                                           |                                |                 |                                          |                                  |                                                  |     |             |      |          |                                                               |                                                                                                            |                                                       |                                                  |                     |                    |                  |
| Medications                                                                                                                                                                                                    | Recommended?                                         |                                                           |                                |                 | Received?                                |                                  |                                                  |     | H H : M M   |      |          |                                                               | If other selected, Specify:                                                                                |                                                       |                                                  |                     |                    |                  |
|                                                                                                                                                                                                                |                                                      | 0                                                         | No                             | 1 Yes           | 0                                        | No                               | 1 Yes                                            |     |             |      |          |                                                               |                                                                                                            |                                                       |                                                  |                     |                    |                  |
| Analgesic                                                                                                                                                                                                      | 0                                                    | No                                                        | 1 Yes                          | 0               | No                                       | 1 Yes                            |                                                  |     |             |      |          |                                                               |                                                                                                            |                                                       |                                                  |                     |                    |                  |
| Sedation                                                                                                                                                                                                       | 0                                                    | No                                                        | 1 Yes                          | 0               | No                                       | 1 Yes                            |                                                  |     |             |      |          |                                                               |                                                                                                            |                                                       |                                                  |                     |                    |                  |
| Antitetanous                                                                                                                                                                                                   | 0                                                    | No                                                        | 1 Yes                          | 0               | No                                       | 1 Yes                            |                                                  |     |             |      |          |                                                               |                                                                                                            |                                                       |                                                  |                     |                    |                  |
| Antibiotic                                                                                                                                                                                                     | 0                                                    | No                                                        | 1 Yes                          | 0               | No                                       | 1 Yes                            |                                                  |     |             |      |          |                                                               |                                                                                                            |                                                       |                                                  |                     |                    |                  |
| Fluid                                                                                                                                                                                                          | 0                                                    | No                                                        | 1 Yes                          | 0               | No                                       | 1 Yes                            |                                                  |     |             |      |          |                                                               |                                                                                                            |                                                       |                                                  |                     |                    |                  |
| Blood                                                                                                                                                                                                          | 0                                                    | No                                                        | 1 Yes                          | 0               | No                                       | 1 Yes                            |                                                  |     |             |      |          |                                                               |                                                                                                            |                                                       |                                                  |                     |                    |                  |
| Other                                                                                                                                                                                                          | 0                                                    | No                                                        | 1 Yes                          | 0               | No                                       | 1 Yes                            |                                                  |     |             |      |          |                                                               |                                                                                                            |                                                       |                                                  |                     |                    |                  |
| Procedure                                                                                                                                                                                                      | Recommended?                                         |                                                           |                                |                 | Received?                                |                                  |                                                  |     | H H : M M   |      |          |                                                               | If recommended but NOT received, which BEST describes WHY not received*?                                   |                                                       |                                                  |                     |                    |                  |
|                                                                                                                                                                                                                |                                                      | 0                                                         | No                             | 1 Yes           | 0                                        | No                               | 1 Yes                                            |     |             |      |          |                                                               |                                                                                                            |                                                       |                                                  |                     |                    |                  |
|                                                                                                                                                                                                                | Split/Cast/Sling                                     | 0                                                         | No                             | 1 Yes           | 0                                        | No                               | 1 Yes                                            |     |             |      |          |                                                               |                                                                                                            |                                                       |                                                  |                     |                    |                  |
|                                                                                                                                                                                                                | External Reduction                                   | 0                                                         | No                             | 1 Yes           | 0                                        | No                               | 1 Yes                                            |     |             |      |          |                                                               |                                                                                                            |                                                       |                                                  |                     |                    |                  |
|                                                                                                                                                                                                                | Debridement /Foreign Body Removal /Laceration Repair | 0                                                         | No                             | 1 Yes           | 0                                        | No                               | 1 Yes                                            |     |             |      |          |                                                               |                                                                                                            |                                                       |                                                  |                     |                    |                  |
|                                                                                                                                                                                                                | Local/Regional Block                                 | 0                                                         | No                             | 1 Yes           | 0                                        | No                               | 1 Yes                                            |     |             |      |          |                                                               |                                                                                                            |                                                       |                                                  |                     |                    |                  |
|                                                                                                                                                                                                                | Pericardiocentesis                                   | 0                                                         | No                             | 1 Yes           | 0                                        | No                               | 1 Yes                                            |     |             |      |          |                                                               |                                                                                                            |                                                       |                                                  |                     |                    |                  |
|                                                                                                                                                                                                                | ORIF/OREF Operative Reduction                        | 0                                                         | No                             | 1 Yes           | 0                                        | No                               | 1 Yes                                            |     |             |      |          |                                                               |                                                                                                            |                                                       |                                                  |                     |                    |                  |
|                                                                                                                                                                                                                | Amputation                                           | 0                                                         | No                             | 1 Yes           | 0                                        | No                               | 1 Yes                                            |     |             |      |          |                                                               |                                                                                                            |                                                       |                                                  |                     |                    |                  |
|                                                                                                                                                                                                                | Laparotomy                                           | 0                                                         | No                             | 1 Yes           | 0                                        | No                               | 1 Yes                                            |     |             |      |          |                                                               |                                                                                                            |                                                       |                                                  |                     |                    |                  |
| Thoracotomy                                                                                                                                                                                                    | 0                                                    | No                                                        | 1 Yes                          | 0               | No                                       | 1 Yes                            |                                                  |     |             |      |          |                                                               |                                                                                                            |                                                       |                                                  |                     |                    |                  |
| *CARE NOT RECEIVED OPTIONS<br>1= Inability to Pay 2=Patient Preference 3=Long wait time<br>4=Patient left AMA 5=No staff 6= No equipment/medication<br>97= Not applicable/Care was received 98=Other (Specify) |                                                      |                                                           |                                |                 |                                          |                                  |                                                  |     |             |      |          |                                                               |                                                                                                            |                                                       |                                                  |                     |                    |                  |
| Disposition                                                                                                                                                                                                    |                                                      |                                                           |                                |                 |                                          |                                  |                                                  |     |             |      |          |                                                               |                                                                                                            |                                                       |                                                  |                     |                    |                  |
| Date                                                                                                                                                                                                           | Time                                                 |                                                           | Vital Signs Taken? 0 No 1 Yes* |                 |                                          |                                  | Cost of treatment (CFA)                          |     |             |      |          |                                                               |                                                                                                            |                                                       |                                                  |                     |                    |                  |
| *Exit vital signs                                                                                                                                                                                              | BP                                                   | /                                                         | HR                             | RR              | Assisted?                                | T                                | Did cost interfere with care? 0 No 1 Yes 99 Unk. |     |             |      |          |                                                               |                                                                                                            |                                                       |                                                  |                     |                    |                  |
| Disposition                                                                                                                                                                                                    | 0 Discharged home*                                   | 2 Admitted to ICU                                         | 4 Died                         | 6 Transferred** | Method of Payment (check all that apply) |                                  |                                                  |     | Insurance   |      |          |                                                               |                                                                                                            |                                                       |                                                  |                     |                    |                  |
|                                                                                                                                                                                                                | 1 Admitted to ward                                   | 3 Directly to OR                                          | 5 Left AMA                     | 99 Unknown      | Self-Pay (cash) Government assistance    |                                  |                                                  |     | Other:      |      |          |                                                               |                                                                                                            |                                                       |                                                  |                     |                    |                  |
| *Sent home to die?                                                                                                                                                                                             | 0 No 1 Yes                                           | ** Transfer Reason: cost / higher care / preference / unk |                                |                 |                                          | Family assistance NGO Assistance |                                                  |     |             | Unk. |          |                                                               |                                                                                                            |                                                       |                                                  |                     |                    |                  |

## NATIONAL TRAUMA REGISTRY
