# Supplementary material for: Associations between social determinants of health and interpersonal violence-related injury in Cameroon: a cross-sectional study
Source: HighWire-hosted journal article supplement (doi:10.1136/bmjgh-2021-007220), 2022-01-01
Supplement: bmjgh-2021-007220supp002_data_supplement.pdf [file bmjgh-2021-007220supp002_data_supplement.pdf]

Table S1: Sociodemographic and injury characteristics of patients excluded due to missing intention of injury or key explanatory variables

| Variable                                 | Included                | Excluded                                       |                      |                                                        |
|------------------------------------------|-------------------------|------------------------------------------------|----------------------|--------------------------------------------------------|
|                                          | Study sample<br>N=7,605 | Missing intention of injury (outcome)<br>n=232 | p value <sup>b</sup> | Missing key explanatory variables <sup>a</sup><br>n=44 |
| <b>Sex, n (%)</b>                        |                         |                                                | 0.100                | <0.001*                                                |
| Male                                     | 5,488 (72.2)            | 156 (67.2)                                     |                      | 43 (97.7)                                              |
| Female                                   | 2,117 (27.8)            | 76 (32.8)                                      |                      | 1 (2.3)                                                |
| <b>Age</b>                               |                         |                                                | 0.021*               | 0.605                                                  |
| 15 – 24, n (%)                           | 1,805 (23.7)            | 63 (27.2)                                      |                      | 12 (27.3)                                              |
| 25 – 34, n (%)                           | 2,590 (34.1)            | 71 (30.6)                                      |                      | 13 (29.5)                                              |
| 35 – 44, n (%)                           | 1,649 (21.7)            | 43 (18.5)                                      |                      | 12 (27.3)                                              |
| 45 – 54, n (%)                           | 805 (10.6)              | 38 (16.4)                                      |                      | 2 (4.5)                                                |
| 55+, n (%)                               | 756 (9.9)               | 17 (7.3)                                       |                      | 5 (11.4)                                               |
| <b>Hospital, n (%)</b>                   |                         |                                                | <0.001*              | 0.001*                                                 |
| LHD                                      | 3,250 (42.7)            | 86 (37.1)                                      |                      | 32 (72.7)                                              |
| LRH                                      | 2,866 (37.7)            | 91 (39.2)                                      |                      | 9 (20.5)                                               |
| ERH                                      | 1,061 (14.0)            | 54 (23.3)                                      |                      | 3 (6.8)                                                |
| CHP                                      | 428 (5.6)               | 1 (0.4)                                        |                      | 0 (0.0)                                                |
| <b>Injury severity score<sup>d</sup></b> |                         |                                                | 0.183                | <0.001*                                                |
| Median [IQR]                             | 8 [2–13]                | 8 [1–22]                                       |                      | 23.5 [8.5–37.5]                                        |
| <b>Overall hospital mortality, n (%)</b> |                         |                                                | <0.001*              | <0.001*                                                |
| Died                                     | 153 (2.0)               | 41 (17.7) <sup>e</sup>                         |                      | 22 (50.0) <sup>e</sup>                                 |
| <b>Intention of injury, n (%)</b>        |                         |                                                | <0.001*              | <0.001*                                                |
| IPVRI                                    | 1,366 (18.0)            | -                                              |                      | 22 (50.0)                                              |
| Unintentional                            | 6,239 (82.0)            | -                                              |                      | 22 (50.0)                                              |
| Missing                                  | -                       | 232 (100.0)                                    |                      | -                                                      |

\* Significant at the p<0.05 level

<sup>a</sup> Excluded due to missing data for all of the following: education level, employment status, and household SES cluster

<sup>b</sup> Comparison between the included sample (N=7,605) and those excluded due to missing intention of injury (n=232)

<sup>c</sup> Comparison between the included sample (N=7,605) and those excluded due to missing all SDH explanatory variables (n=44)

<sup>d</sup> Injury severity score (ISS) ranges from 1–75, with higher scores indicating more severe injury.

<sup>e</sup> Overall hospital mortality was missing for 7 of those in the missing intentional injury group, and 3 of those in the missing key explanatory variables group

Abbreviations: Social determinant of health (SDH), Laquintinie Hospital of Douala (LHD), Limbe Regional Hospital (LRH), Edea Regional Hospital (ERH), Catholic Hospital Pouma (CHP), interquartile range (IQR), interpersonal violence related injury (IPVRI)

Table S2: Adjusted logistic regression models estimating associations with interpersonal violence related injury among male patients who sought hospital-level care in Cameroon between 2017-2020 (n=5,488)

| Variables                       | Adjusted model 1,<br>education level |         | Adjusted model 2,<br>employment status |         | Adjusted model 3,<br>household SES cluster |         | Adjusted model 4,<br>alcohol use |         | Adjusted model 5,<br>all three SDH |         | Adjusted model, full <sup>a</sup> |         |
|---------------------------------|--------------------------------------|---------|----------------------------------------|---------|--------------------------------------------|---------|----------------------------------|---------|------------------------------------|---------|-----------------------------------|---------|
|                                 | aOR [95% CI]                         | p value | aOR [95% CI]                           | p value | aOR [95% CI]                               | p value | aOR [95% CI]                     | p value | aOR [95% CI]                       | p value | aOR [95% CI]                      | p value |
| <b>Education level</b>          |                                      |         |                                        |         |                                            |         |                                  |         |                                    |         |                                   |         |
| Primary or no formal            | 1.23 [0.95–1.60]                     | 0.117   | -                                      | -       | -                                          | -       | -                                | -       | 1.22 [0.92–1.63]                   | 0.167   | 1.22 [0.91–1.64]                  | 0.174   |
| Secondary/high school           | 1.00 [0.78–1.29]                     | 0.990   | -                                      | -       | -                                          | -       | -                                | -       | 1.08 [0.83–1.41]                   | 0.574   | 1.07 [0.82–1.40]                  | 0.623   |
| Tertiary/university             | Ref.                                 | Ref.    | -                                      | -       | -                                          | -       | -                                | -       | Ref.                               | Ref.    | Ref.                              | Ref.    |
| Missing data                    | 1.35 [0.97–1.89]                     | 0.076   | -                                      | -       | -                                          | -       | -                                | -       | 1.24 [0.87–1.78]                   | 0.230   | 1.26 [0.88–1.80]                  | 0.212   |
| <b>Employment status</b>        |                                      |         |                                        |         |                                            |         |                                  |         |                                    |         |                                   |         |
| Employed <sup>b</sup>           | -                                    | -       | Ref.                                   | Ref.    | -                                          | -       | -                                | -       | Ref.                               | Ref.    | Ref.                              | Ref.    |
| Unemployed <sup>c</sup>         | -                                    | -       | 2.52 [2.03–3.13]                       | <0.001* | -                                          | -       | -                                | -       | 2.48 [1.99–3.10]                   | <0.001* | 2.44 [1.95–3.06]                  | <0.001* |
| Retired                         | -                                    | -       | 0.70 [0.34–1.43]                       | 0.330   | -                                          | -       | -                                | -       | 0.75 [0.36–1.54]                   | 0.430   | 0.75 [0.36–1.55]                  | 0.438   |
| Student or apprentice           | -                                    | -       | 1.16 [0.90–1.48]                       | 0.246   | -                                          | -       | -                                | -       | 1.29 [0.99–1.68]                   | 0.060   | 1.30 [0.99–1.70]                  | 0.055   |
| Missing data                    | -                                    | -       | 2.05 [1.34–3.16]                       | 0.001*  | -                                          | -       | -                                | -       | 1.87 [1.20–2.90]                   | 0.005*  | 1.88 [1.20–2.94]                  | 0.005*  |
| <b>Household SES cluster</b>    |                                      |         |                                        |         |                                            |         |                                  |         |                                    |         |                                   |         |
| Rural <sup>d</sup>              | -                                    | -       | -                                      | -       | 1.48 [1.07–2.04]                           | 0.017*  | -                                | -       | 1.45 [1.05–2.02]                   | 0.026*  | 1.45 [1.04–2.03]                  | 0.028*  |
| Urban poor                      | -                                    | -       | -                                      | -       | 2.59 [1.62–4.13]                           | <0.001* | -                                | -       | 2.08 [1.28–3.39]                   | 0.003*  | 2.08 [1.27–3.41]                  | 0.004*  |
| Urban MC homeowners             | -                                    | -       | -                                      | -       | 1.17 [0.90–1.52]                           | 0.246   | -                                | -       | 1.09 [0.83–1.44]                   | 0.518   | 1.10 [0.84–1.45]                  | 0.489   |
| Urban MC tenants                | -                                    | -       | -                                      | -       | 1.15 [0.93–1.42]                           | 0.211   | -                                | -       | 1.19 [0.96–1.49]                   | 0.120   | 1.23 [0.98–1.54]                  | 0.069   |
| Urban wealthy                   | -                                    | -       | -                                      | -       | Ref.                                       | Ref.    | -                                | -       | Ref.                               | Ref.    | Ref.                              | Ref.    |
| Missing data                    | -                                    | -       | -                                      | -       | 1.40 [0.92–2.12]                           | 0.113   | -                                | -       | 1.33 [0.87–2.03]                   | 0.186   | 1.35 [0.88–2.07]                  | 0.166   |
| <b>Alcohol use <sup>e</sup></b> |                                      |         |                                        |         |                                            |         |                                  |         |                                    |         |                                   |         |
| Yes                             | -                                    | -       | -                                      | -       | -                                          | -       | 2.35 [1.93–2.85]                 | <0.001* | -                                  | -       | 2.33 [1.91–2.83]                  | <0.001* |
| No                              | -                                    | -       | -                                      | -       | -                                          | -       | Ref.                             | Ref.    | -                                  | -       | Ref.                              | Ref.    |
| Unknown                         | -                                    | -       | -                                      | -       | -                                          | -       | 1.36 [1.09–1.68]                 | 0.006*  | -                                  | -       | 1.21 [0.97–1.51]                  | 0.089   |
| <b>Age group</b>                |                                      |         |                                        |         |                                            |         |                                  |         |                                    |         |                                   |         |
| 15–24                           | Ref.                                 | Ref.    | Ref.                                   | Ref.    | Ref.                                       | Ref.    | Ref.                             | Ref.    | Ref.                               | Ref.    | Ref.                              | Ref.    |
| 25–34                           | 0.87 [0.73–1.04]                     | 0.118   | 0.93 [0.77–1.12]                       | 0.447   | 0.89 [0.75–1.07]                           | 0.216   | 0.84 [0.71–1.00]                 | 0.050   | 0.93 [0.77–1.14]                   | 0.499   | 0.88 [0.73–1.08]                  | 0.224   |
| 35–44                           | 0.71 [0.58–0.86]                     | 0.001*  | 0.80 [0.64–1.00]                       | 0.047*  | 0.72 [0.58–0.89]                           | 0.002*  | 0.70 [0.57–0.86]                 | 0.001*  | 0.81 [0.65–1.02]                   | 0.077   | 0.80 [0.63–1.01]                  | 0.057   |
| 45–54                           | 0.72 [0.55–0.93]                     | 0.012*  | 0.82 [0.62–1.08]                       | 0.153   | 0.74 [0.57–0.97]                           | 0.027*  | 0.70 [0.54–0.91]                 | 0.007*  | 0.85 [0.65–1.13]                   | 0.269   | 0.83 [0.63–1.10]                  | 0.198   |
| 55+                             | 0.39 [0.28–0.54]                     | <0.001* | 0.48 [0.33–0.69]                       | <0.001* | 0.40 [0.29–0.56]                           | <0.001* | 0.39 [0.28–0.54]                 | <0.001* | 0.49 [0.34–0.72]                   | <0.001* | 0.50 [0.34–0.72]                  | <0.001* |
| <b>Hospital</b>                 |                                      |         |                                        |         |                                            |         |                                  |         |                                    |         |                                   |         |
| LHD                             | Ref.                                 | Ref.    | Ref.                                   | Ref.    | Ref.                                       | Ref.    | Ref.                             | Ref.    | Ref.                               | Ref.    | Ref.                              | Ref.    |
| LRH                             | 0.46 [0.39–0.54]                     | <0.001* | 0.51 [0.44–0.60]                       | <0.001* | 0.48 [0.41–0.56]                           | <0.001* | 0.54 [0.46–0.64]                 | <0.001* | 0.52 [0.44–0.61]                   | <0.001* | 0.59 [0.49–0.70]                  | <0.001* |
| ERH                             | 0.49 [0.39–0.61]                     | <0.001* | 0.50 [0.40–0.63]                       | <0.001* | 0.45 [0.35–0.57]                           | <0.001* | 0.51 [0.41–0.64]                 | <0.001* | 0.48 [0.38–0.61]                   | <0.001* | 0.51 [0.40–0.65]                  | <0.001* |
| CHP                             | 0.15 [0.09–0.26]                     | <0.001* | 0.16 [0.09–0.27]                       | <0.001* | 0.13 [0.08–0.23]                           | <0.001* | 0.11 [0.06–0.19]                 | <0.001* | 0.16 [0.09–0.27]                   | <0.001* | 0.12 [0.07–0.21]                  | <0.001* |

\* Significant at the p&lt;0.05 level

<sup>a</sup> Results are the same as those presented in Table 3<sup>b</sup> Includes trauma registry categories of self-employed, salaried worker, and any applicable free text responses were grouped<sup>c</sup> Includes unemployed (unable to work) and unemployed (able to work)<sup>d</sup> Rural poor and rural wealthy household SES clusters were combined due to the small sample size of rural poor<sup>e</sup> “Did alcohol likely contribute to this injury?”

Abbreviations: aOR (adjusted odds ratio), CI (confidence interval), Ref. (reference), MC (middle-class), Laquintinie Hospital of Douala (LHD), Limbe Regional Hospital (LRH), Edea Regional Hospital (ERH), Catholic Hospital Pouma (CHP)

Table S3: Adjusted logistic regression models estimating associations with interpersonal violence related injury among female patients who sought hospital-level care in Cameroon between 2017-2020 (n=2,117)

| Variables                       | Adjusted model 1,<br>education level |                     | Adjusted model 2,<br>employment status |                     | Adjusted model 3,<br>household SES cluster |                     | Adjusted model 4,<br>alcohol use |                     | Adjusted model 5,<br>all three SDH |                     | Adjusted model, full <sup>a</sup> |                     |
|---------------------------------|--------------------------------------|---------------------|----------------------------------------|---------------------|--------------------------------------------|---------------------|----------------------------------|---------------------|------------------------------------|---------------------|-----------------------------------|---------------------|
|                                 | aOR [95% CI]                         | p value             | aOR [95% CI]                           | p value             | aOR [95% CI]                               | p value             | aOR [95% CI]                     | p value             | aOR [95% CI]                       | p value             | aOR [95% CI]                      | p value             |
| <b>Education level</b>          |                                      |                     |                                        |                     |                                            |                     |                                  |                     |                                    |                     |                                   |                     |
| Primary or no formal            | 2.27 [1.49–3.47]                     | <0.001 <sup>*</sup> | -                                      | -                   | -                                          | -                   | -                                | -                   | 1.90 [1.18–3.04]                   | 0.008 <sup>*</sup>  | 1.78 [1.10–2.87]                  | 0.019 <sup>*</sup>  |
| Secondary/high school           | 1.64 [1.12–2.41]                     | 0.011 <sup>*</sup>  | -                                      | -                   | -                                          | -                   | -                                | -                   | 1.54 [1.03–2.30]                   | 0.036 <sup>*</sup>  | 1.54 [1.03–2.32]                  | 0.037 <sup>*</sup>  |
| Tertiary/university             | Ref.                                 | Ref.                | -                                      | -                   | -                                          | -                   | -                                | -                   | Ref.                               | Ref.                | Ref.                              | Ref.                |
| Missing data                    | 1.72 [1.00–2.98]                     | 0.051               | -                                      | -                   | -                                          | -                   | -                                | -                   | 1.40 [0.79–2.49]                   | 0.246               | 1.41 [0.79–2.52]                  | 0.238               |
| <b>Employment status</b>        |                                      |                     |                                        |                     |                                            |                     |                                  |                     |                                    |                     |                                   |                     |
| Employed <sup>b</sup>           | -                                    | -                   | Ref.                                   | Ref.                | -                                          | -                   | -                                | -                   | Ref.                               | Ref.                | Ref.                              | Ref.                |
| Unemployed <sup>c</sup>         | -                                    | -                   | 2.44 [1.33–4.45]                       | 0.004 <sup>*</sup>  | -                                          | -                   | -                                | -                   | 2.57 [1.39–4.77]                   | 0.003 <sup>*</sup>  | 2.53 [1.35–4.72]                  | 0.004 <sup>*</sup>  |
| Retired or housewife            | -                                    | -                   | 1.44 [1.05–1.99]                       | 0.025 <sup>*</sup>  | -                                          | -                   | -                                | -                   | 1.34 [0.96–1.86]                   | 0.084               | 1.32 [0.95–1.85]                  | 0.100               |
| Student or apprentice           | -                                    | -                   | 0.73 [0.47–1.14]                       | 0.166               | -                                          | -                   | -                                | -                   | 0.89 [0.55–1.43]                   | 0.630               | 0.89 [0.55–1.44]                  | 0.629               |
| Missing data                    | -                                    | -                   | 3.36 [0.79–14.3]                       | 0.101               | -                                          | -                   | -                                | -                   | 3.63 [0.83–16.0]                   | 0.088               | 3.89 [0.88–17.1]                  | 0.072               |
| <b>Household SES cluster</b>    |                                      |                     |                                        |                     |                                            |                     |                                  |                     |                                    |                     |                                   |                     |
| Rural <sup>d</sup>              | -                                    | -                   | -                                      | -                   | 1.97 [1.16–3.33]                           | 0.011 <sup>*</sup>  | -                                | -                   | 1.78 [1.05–3.03]                   | 0.034 <sup>*</sup>  | 1.60 [0.93–2.75]                  | 0.090               |
| Urban poor                      | -                                    | -                   | -                                      | -                   | 2.14 [0.73–6.26]                           | 0.163               | -                                | -                   | 2.21 [0.75–6.52]                   | 0.150               | 2.39 [0.81–7.06]                  | 0.116               |
| Urban MC homeowners             | -                                    | -                   | -                                      | -                   | 1.24 [0.75–2.05]                           | 0.393               | -                                | -                   | 1.03 [0.61–1.74]                   | 0.901               | 1.07 [0.63–1.81]                  | 0.799               |
| Urban MC tenants                | -                                    | -                   | -                                      | -                   | 0.97 [0.69–1.36]                           | 0.854               | -                                | -                   | 0.93 [0.66–1.31]                   | 0.671               | 0.93 [0.65–1.32]                  | 0.681               |
| Urban wealthy                   | -                                    | -                   | -                                      | -                   | Ref.                                       | Ref.                | -                                | -                   | Ref.                               | Ref.                | Ref.                              | Ref.                |
| Missing data                    | -                                    | -                   | -                                      | -                   | 0.79 [0.38–1.63]                           | 0.516               | -                                | -                   | 0.67 [0.32–1.41]                   | 0.293               | 0.71 [0.34–1.49]                  | 0.364               |
| <b>Alcohol use <sup>e</sup></b> |                                      |                     |                                        |                     |                                            |                     |                                  |                     |                                    |                     |                                   |                     |
| Yes                             | -                                    | -                   | -                                      | -                   | -                                          | -                   | 3.94 [2.58–6.02]                 | <0.001 <sup>*</sup> | -                                  | -                   | 3.71 [2.41–5.72]                  | <0.001 <sup>*</sup> |
| No                              | -                                    | -                   | -                                      | -                   | -                                          | -                   | Ref.                             | Ref.                | -                                  | -                   | Ref.                              | Ref.                |
| Unknown                         | -                                    | -                   | -                                      | -                   | -                                          | -                   | 0.69 [0.37–1.26]                 | 0.223               | -                                  | -                   | 0.74 [0.40–1.36]                  | 0.329               |
| <b>Age group</b>                |                                      |                     |                                        |                     |                                            |                     |                                  |                     |                                    |                     |                                   |                     |
| 15–24                           | Ref.                                 | Ref.                | Ref.                                   | Ref.                | Ref.                                       | Ref.                | Ref.                             | Ref.                | Ref.                               | Ref.                | Ref.                              | Ref.                |
| 25–34                           | 1.23 [0.89–1.69]                     | 0.211               | 1.02 [0.70–1.50]                       | 0.915               | 1.31 [0.94–1.83]                           | 0.112               | 1.24 [0.90–1.71]                 | 0.188               | 1.19 [0.79–1.80]                   | 0.400               | 1.20 [0.79–1.81]                  | 0.393               |
| 35–44                           | 0.81 [0.56–1.17]                     | 0.257               | 0.72 [0.47–1.13]                       | 0.154               | 0.93 [0.64–1.35]                           | 0.688               | 0.72 [0.64–1.33]                 | 0.663               | 0.79 [0.50–1.26]                   | 0.326               | 0.83 [0.52–1.32]                  | 0.429               |
| 45–54                           | 0.55 [0.34–0.89]                     | 0.015 <sup>*</sup>  | 0.49 [0.28–0.83]                       | 0.008 <sup>*</sup>  | 0.61 [0.38–0.97]                           | 0.038 <sup>*</sup>  | 0.64 [0.39–1.02]                 | 0.062               | 0.51 [0.30–0.89]                   | 0.017 <sup>*</sup>  | 0.55 [0.31–0.95]                  | 0.032 <sup>*</sup>  |
| 55+                             | 0.23 [0.12–0.42]                     | <0.001 <sup>*</sup> | 0.20 [0.10–0.38]                       | <0.001 <sup>*</sup> | 0.27 [0.15–0.49]                           | <0.001 <sup>*</sup> | 0.32 [0.17–0.58]                 | <0.001 <sup>*</sup> | 0.19 [0.10–0.37]                   | <0.001 <sup>*</sup> | 0.22 [0.11–0.43]                  | <0.001 <sup>*</sup> |
| <b>Hospital</b>                 |                                      |                     |                                        |                     |                                            |                     |                                  |                     |                                    |                     |                                   |                     |
| LHD                             | Ref.                                 | Ref.                | Ref.                                   | Ref.                | Ref.                                       | Ref.                | Ref.                             | Ref.                | Ref.                               | Ref.                | Ref.                              | Ref.                |
| LRH                             | 1.31 [0.98–1.75]                     | 0.070               | 1.28 [0.96–1.70]                       | 0.097               | 1.22 [0.92–1.62]                           | 0.163               | 1.33 [0.99–1.78]                 | 0.059               | 1.39 [1.03–1.88]                   | 0.033 <sup>*</sup>  | 1.51 [1.10–2.07]                  | 0.011 <sup>*</sup>  |
| ERH                             | 1.38 [0.95–2.02]                     | 0.091               | 1.35 [0.92–1.97]                       | 0.121               | 1.08 [0.70–1.65]                           | 0.734               | 1.48 [1.00–2.17]                 | 0.047 <sup>*</sup>  | 1.08 [0.70–1.65]                   | 0.740               | 1.17 [0.76–1.82]                  | 0.473               |
| CHP                             | 0.53 [0.22–1.25]                     | 0.145               | 0.40 [0.17–0.96]                       | 0.039 <sup>*</sup>  | 0.34 [0.14–0.83]                           | 0.018 <sup>*</sup>  | 0.35 [0.15–0.84]                 | 0.019 <sup>*</sup>  | 0.34 [0.14–0.86]                   | 0.023 <sup>*</sup>  | 0.26 [0.10–0.69]                  | 0.006 <sup>*</sup>  |

\* Significant at the p<0.05 level

<sup>a</sup> Results are the same as those presented in Table 3

<sup>b</sup> Includes trauma registry categories of self-employed, salaried worker, and any applicable free text responses were grouped

<sup>c</sup> Includes unemployed (unable to work) and unemployed (able to work)

<sup>d</sup> Rural poor and rural wealthy household SES clusters were combined due to the small sample size of rural poor

<sup>e</sup> “Did alcohol likely contribute to this injury?”

Abbreviations: aOR (adjusted odds ratio), CI (confidence interval), Ref. (reference), MC (middle-class), Laquintinie Hospital of Douala (LHD), Limbe Regional Hospital (LRH), Edea Regional Hospital (ERH), Catholic Hospital Pouma (CHP)
